# Supplementary material
Source: PubMed Central journal article supplement (PMC10175536)
Supplement: 41598_2023_34702_MOESM1_ESM.pdf [file 41598_2023_34702_MOESM1_ESM.pdf]

**Elevated serum uric acid is associated with infertility in women living in America**

**Xiang Hong<sup>#</sup>, Fanqi Zhao<sup>#</sup>, Wei Wang, Jingying Wu, Xiaoqi Zhu, Bei Wang<sup>\*</sup>**

<sup>1</sup>Key Laboratory of Environmental Medicine and Engineering of Ministry of Education, Department of Epidemiology and Health Statistics, School of Public Health, Southeast University, Nanjing, Jiangsu, China

<sup>#</sup>These authors contributed equally to this work and should be considered co-first authors.

<sup>\*</sup>**Corresponding author:** #87, Dingjiaqiao Road, Gulou District, Nanjing City, Jiangsu Province, China. 210009. Email: [wangbeilxb@163.com](mailto:wangbeilxb@163.com)

## **Supplementary material**

**Supplementary Table 1.** The association between uric acid and infertility in the complete case

**Supplementary Table 2.** Stratified analysis of complete cases

**Supplementary Table 1.** The association between uric acid and infertility in the complete case

|                                     | Infertility | Control | Unadjusted OR<br>(95%CI) | P-value           | Adjusted OR<br>(95%CI) <sup>a</sup> | P-value           | Adjusted OR<br>(95%CI) <sup>b</sup> | P-value      |
|-------------------------------------|-------------|---------|--------------------------|-------------------|-------------------------------------|-------------------|-------------------------------------|--------------|
| Uric acid<br>(continuous variable)  | 295         | 1902    | <b>1.24 (1.11, 1.37)</b> | <b>&lt; 0.001</b> | <b>1.22 (1.1, 1.36)</b>             | <b>&lt; 0.001</b> | 1.17 (0.97, 1.42)                   | 0.102        |
| Uric acid<br>(categorical variable) |             |         |                          |                   |                                     |                   |                                     |              |
| 2.4-5.7                             | 249         | 1654    | 1.00 (1.00, 1.00)        | 1                 | 1.00 (1.00, 1.00)                   | 1                 | 1.00 (1.00, 1.00)                   | 1            |
| <2.4                                | 1           | 16      | 0.42 (0.05, 3.14)        | 0.395             | 0.38 (0.05, 2.9)                    | 0.35              | -                                   | 0.984        |
| >5.7                                | 45          | 232     | 1.29 (0.91, 1.82)        | 0.151             | 1.2 (0.84, 1.71)                    | 0.319             | 0.82 (0.45, 1.5)                    | 0.512        |
| Uric acid (quartile)                |             |         |                          |                   |                                     |                   |                                     |              |
| Q1 (1.6-3.7)                        | 52          | 508     | 1.00 (1.00, 1.00)        | 1                 | 1.00 (1.00, 1.00)                   | 1                 | 1.00 (1.00, 1.00)                   | 1            |
| Q2 (3.7-4.4)                        | 67          | 503     | 1.3 (0.89, 1.91)         | 0.177             | 1.29 (0.88, 1.9)                    | 0.198             | 1.18 (0.63, 2.2)                    | 0.614        |
| Q3 (4.4-5.1)                        | 84          | 443     | <b>1.85 (1.28, 2.68)</b> | <b>0.001</b>      | <b>1.85 (1.27, 2.68)</b>            | <b>0.001</b>      | <b>2.1 (1.15, 3.84)</b>             | <b>0.015</b> |
| Q4 (5.1-18.0)                       | 92          | 448     | <b>2.01 (1.4, 2.88)</b>  | <b>&lt; 0.001</b> | <b>1.98 (1.37, 2.88)</b>            | <b>&lt; 0.001</b> | <b>1.95 (1.02, 3.72)</b>            | <b>0.045</b> |

<sup>a</sup>Adjusted for age, race, marital status, smoking, alcohol, history of pregnancy, history of diabetes, history of hypertension.

<sup>b</sup>Adjusted for age, race, marital status, smoking, alcohol, history of pregnancy, history of diabetes, history of hypertension, fasting glucose, total cholesterol, creatinine-refrigerated serum, LDL-cholesterol, direct HDL-cholesterol, glycohemoglobin, BMI.

**Supplementary Table 2.** Stratified analysis of complete cases

| Stratified factor            | N    | Q1  | Q2<br>OR (95%CI)   | P     | Q3<br>OR (95%CI)          | P            | Q4<br>OR (95%CI)          | P            |
|------------------------------|------|-----|--------------------|-------|---------------------------|--------------|---------------------------|--------------|
| <b>Age (years)</b>           |      |     |                    |       |                           |              |                           |              |
| ≤35                          | 1135 | ref | 1.48 (0.52, 4.18)  | 0.463 | <b>2.83 (1.02, 7.79)</b>  | <b>0.045</b> | 2.38 (0.83, 6.84)         | 0.108        |
| >35                          | 1062 | ref | 0.96 (0.42, 2.18)  | 0.921 | 1.62 (0.73, 3.61)         | 0.234        | 1.58 (0.65, 3.81)         | 0.313        |
| <b>Marital status</b>        |      |     |                    |       |                           |              |                           |              |
| Married/Living with Partner  | 1431 | ref | 1.09 (0.53, 2.28)  | 0.808 | <b>2.32 (1.15, 4.65)</b>  | <b>0.018</b> | 1.73 (0.81, 3.7)          | 0.159        |
| Widowed/Divorced/Separated   | 278  | ref | 2.02 (0.32, 12.6)  | 0.453 | 1.4 (0.22, 8.86)          | 0.721        | 1.69 (0.18, 16.1)         | 0.648        |
| Never married                | 488  | ref | 2.14 (0.27, 16.74) | 0.47  | 2.55 (0.3, 21.61)         | 0.39         | <b>8.97 (1.01, 80.02)</b> | <b>0.049</b> |
| <b>BMI</b>                   |      |     |                    |       |                           |              |                           |              |
| <18.5                        | 42   | ref | -                  | -     | -                         | -            | -                         | -            |
| 18.5-24.9                    | 614  | ref | 0.97 (0.31, 2.98)  | 0.951 | <b>3.42 (1.15, 10.13)</b> | <b>0.026</b> | 0.84 (0.14, 5.02)         | 0.846        |
| 25-29.9                      | 548  | ref | 0.65 (0.12, 3.51)  | 0.619 | 2.55 (0.59, 11.06)        | 0.211        | 3.45 (0.76, 15.76)        | 0.11         |
| ≥30                          | 979  | ref | 1.91 (0.63, 5.81)  | 0.255 | 2.15 (0.74, 6.23)         | 0.159        | 2.21 (0.77, 6.33)         | 0.139        |
| <b>Database year</b>         |      |     |                    |       |                           |              |                           |              |
| 2013-2016                    | 1266 | ref | 1.29 (0.52, 3.22)  | 0.584 | 1.89 (0.77, 4.62)         | 0.166        | 2 (0.77, 5.21)            | 0.154        |
| 2017-March 2020 pre-pandemic | 931  | ref | 0.99 (0.39, 2.51)  | 0.987 | 2.27 (0.95, 5.44)         | 0.065        | 2.07 (0.79, 5.41)         | 0.139        |

BMI: body mass index.
